# Supplementary material for: The economic outlook for converting CO2 and electrons to molecules
Source: Royal Society of Chemistry journal article supplement (doi:10.1039/d0ee03525d), 2021-01-01
Supplement: d0ee03525d1.pdf [file d0ee03525d1.pdf]

## Supplementary Information for

### The Economic Outlook for Converting CO<sub>2</sub> and Electrons to Molecules

Zhe Huang<sup>1,2</sup>, R. Gary Grim<sup>1,2</sup>, Joshua A. Schaidle<sup>1\*</sup>, and Ling Tao<sup>1\*</sup>

<sup>1</sup> National Renewable Energy Laboratory, Golden, CO, USA.

<sup>2</sup> These authors contributed equally to this work

\*Corresponding Authors: [joshua.schaidle@nrel.gov](mailto:joshua.schaidle@nrel.gov), [ling.tao@nrel.gov](mailto:ling.tao@nrel.gov)

**Complementary Website:** Interactive visualizations of the cost breakdown information reported in this manuscript can be found at: <https://www.nrel.gov/bioenergy/co2-utilization-economics/>.

#### Table of Contents

|                                                                                                |    |
|------------------------------------------------------------------------------------------------|----|
| 1. Process Flow Diagram and System Boundary of Studied CO <sub>2</sub> Reduction Processes.... | 2  |
| 2. Material Unit Prices.....                                                                   | 2  |
| 3. Capital and Operating Cost Assumptions .....                                                | 3  |
| 4. Major Economic Assumptions.....                                                             | 5  |
| 5. Cost Breakdown Analysis.....                                                                | 7  |
| 6. Sensitivity Analysis.....                                                                   | 11 |
| 7. CO <sub>2</sub> Price Sensitivity under Current Scenario.....                               | 16 |
| 8. References.....                                                                             | 17 |

## 1. Process Flow Diagram and System Boundary of Studied CO<sub>2</sub> Reduction Processes

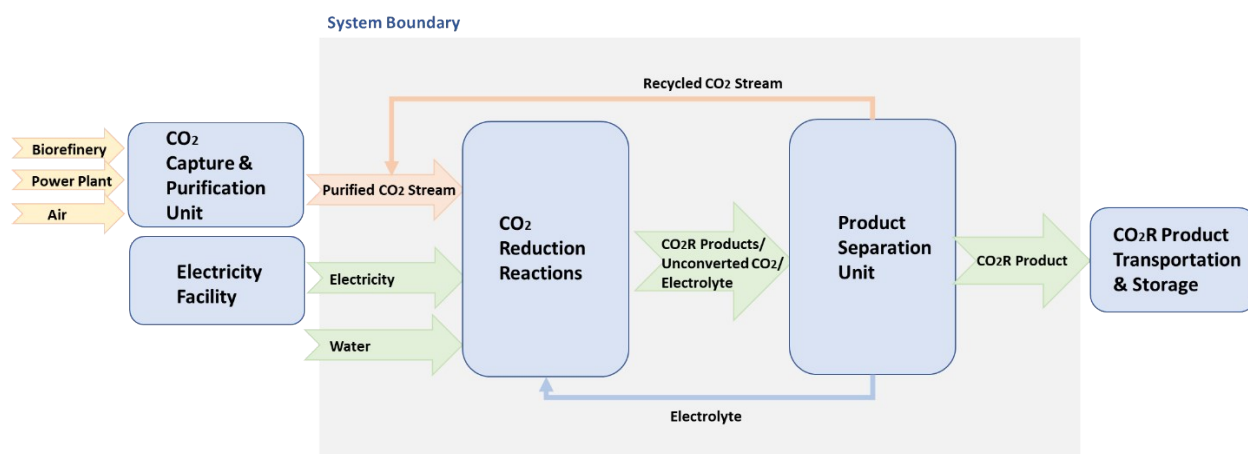

**Figure S1.** Process flow diagram of the CO<sub>2</sub> reduction processes. The system boundary in this study is shown by shaded area including the CO<sub>2</sub> reduction, recycle of unconverted feedstocks, and product purification stages. Adapted from ref [21].

## 2. Material Unit Prices

**Table S1:** Raw material unit prices inflated to 2016\$

| Components                                                     | Cost (2016\$)             | Ref                                 |
|----------------------------------------------------------------|---------------------------|-------------------------------------|
| Sulfuric acid                                                  | \$0.09kg <sup>-1</sup>    | IHS Market Connect <sup>1</sup>     |
| Lime                                                           | \$0.15kg <sup>-1</sup>    | IHS Market Connect <sup>1</sup>     |
| Monopotassium phosphate                                        | \$1.76kg <sup>-1</sup>    | IHS Market Connect <sup>1</sup>     |
| Dipotassium phosphate                                          | \$1.49kg <sup>-1</sup>    | IHS Market Connect <sup>1</sup>     |
| Ammonium sulfate                                               | \$0.26kg <sup>-1</sup>    | IHS Market Connect <sup>1</sup>     |
| Magnesium sulfate heptahydrate                                 | \$0.64kg <sup>-1</sup>    | IHS Market Connect <sup>1</sup>     |
| Sodium chloride                                                | \$0.06kg <sup>-1</sup>    | IHS Market Connect <sup>1</sup>     |
| Magnesium chloride hexahydrate                                 | \$0.37kg <sup>-1</sup>    | IHS Market Connect <sup>1</sup>     |
| Ferrous sulfate                                                | \$0.17kg <sup>-1</sup>    | IHS Market Connect <sup>1</sup>     |
| Sodium sulfide                                                 | \$0.60kg <sup>-1</sup>    | IHS Market Connect <sup>1</sup>     |
| Calcium chloride                                               | \$0.36kg <sup>-1</sup>    | IHS Market Connect <sup>1</sup>     |
| Ammonium chloride                                              | \$0.09kg <sup>-1</sup>    | IHS Market Connect <sup>1</sup>     |
| Yeast extract                                                  | \$1.33kg <sup>-1</sup>    | IHS Market Connect <sup>1</sup>     |
| CO (sold)                                                      | \$0.18kg <sup>-1</sup>    | IHS Market Connect <sup>1</sup>     |
| Hydrogen (sold)                                                | \$1.47kg <sup>-1</sup>    | IHS Market Connect <sup>1</sup>     |
| Acetic acid (sold)                                             | \$0.61kg <sup>-1</sup>    | IHS Market Connect <sup>1</sup>     |
| Ethylene (sold)                                                | \$0.71kg <sup>-1</sup>    | IHS Market Connect <sup>1</sup>     |
| Cu-Zn Catalyst                                                 | \$20.38kg <sup>-1</sup>   | 2010 NREL Report <sup>2</sup>       |
| Cobalt Catalyst                                                | \$38.21kg <sup>-1</sup>   | 2010 NREL Report <sup>2</sup>       |
| CuZnOAl <sub>2</sub> O <sub>3</sub> Catalyst                   | \$22.75kg <sup>-1</sup>   | 2015 NREL Report <sup>3</sup>       |
| CuZnOAl <sub>2</sub> O <sub>3</sub> /HZM <sub>5</sub> Catalyst | \$24.18kg <sup>-1</sup>   | 2015 NREL Report <sup>3</sup>       |
| 23%Ni/Al <sub>2</sub> O <sub>3</sub> /5%CaO Catalyst           | \$10.00kg <sup>-1</sup>   | Alibaba <sup>4</sup>                |
| Fresh water                                                    | \$0.00022kg <sup>-1</sup> | 2015 NREL Report <sup>3</sup>       |
| Amine                                                          | \$823.00kg <sup>-1</sup>  | Mar Perez-Fortes, 2016 <sup>5</sup> |
| Natural gas                                                    | \$3.00MMBTU <sup>-1</sup> | 2019 EIA Data <sup>6</sup>          |

Cost from IHS Market Connect is 5 year (2014-2018) average U.S. market price in 2016\$

**Table S2:** U.S. market price for studied CO<sub>2</sub>R products in 2016<sup>1,7</sup>.

| Species                        | US Market Price <sup>a</sup><br>(2016\$) | High Bar <sup>b</sup>  | Low Bar <sup>b</sup>   |
|--------------------------------|------------------------------------------|------------------------|------------------------|
| <b>Carbon monoxide</b>         | \$0.18kg <sup>-1</sup>                   | \$0.23kg <sup>-1</sup> | \$0.14kg <sup>-1</sup> |
| <b>Formic acid</b>             | \$0.66kg <sup>-1</sup>                   | \$0.70kg <sup>-1</sup> | \$0.63kg <sup>-1</sup> |
| <b>Methanol</b>                | \$0.35kg <sup>-1</sup>                   | \$0.46kg <sup>-1</sup> | \$0.23kg <sup>-1</sup> |
| <b>Methane <sup>c</sup></b>    | \$0.15kg <sup>-1</sup>                   | \$0.22kg <sup>-1</sup> | \$0.12kg <sup>-1</sup> |
| <b>Acetic acid</b>             | \$0.61kg <sup>-1</sup>                   | \$0.71kg <sup>-1</sup> | \$0.50kg <sup>-1</sup> |
| <b>Oxalic acid</b>             | \$1.73kg <sup>-1</sup>                   | n.a.                   | n.a.                   |
| <b>Ethanol</b>                 | \$0.52kg <sup>-1</sup>                   | \$0.73kg <sup>-1</sup> | \$0.43kg <sup>-1</sup> |
| <b>Ethylene</b>                | \$0.71kg <sup>-1</sup>                   | \$1.29kg <sup>-1</sup> | \$0.38kg <sup>-1</sup> |
| <b>Polyhydroxybutyrate</b>     | \$1.50kg <sup>-1</sup>                   | n.a.                   | n.a.                   |
| <b>Dimethyl ether</b>          | \$0.65kg <sup>-1</sup>                   | \$0.76kg <sup>-1</sup> | \$0.53kg <sup>-1</sup> |
| <b>Fischer-Tropsch liquids</b> | \$0.97kg <sup>-1</sup>                   | \$1.27kg <sup>-1</sup> | \$0.80kg <sup>-1</sup> |

a: 2014-2018 average market price in United States.

b: High/Low bars reflect the upper and lower bounds of the observed market price in the 2008-2018 period.

c: Renewable natural gas (RNG) has higher market price of \$0.37-\$1.31/kg compared with reported natural gas market price<sup>8</sup>.

### 3. Capital and Operating Cost Assumptions

**Table S3:** Cost assumptions for LTE/HTE/MES CO<sub>2</sub> Electrolyzers

From the DOE H2A analysis for central electrolysis, the reported capital costs for PEM, SOEC and Alkaline water electrolyzers are used to estimate the CO<sub>2</sub> Electrolyzer capital costs for LTE, HTE and MES pathways, respectively. The equation below is used to calculate CO<sub>2</sub> electrolyzer capital costs on the basis of \$/m<sup>2</sup>.

$$\text{CO}_2 \text{ Electrolyzer installed capital cost (\$/m}^2\text{)} = \text{Uninstalled capital cost (\$/kW)} \times \text{Cell voltage (V)} \times \text{Current Density (mA/cm}^2\text{)} \times (1000\text{mA/A}) \times (1\text{kW}/1000\text{W}) \times (10000\text{cm}^2/\text{m}^2) \times \text{Installation Factor}$$

| Parameter                    | Uninstalled Capital Cost (\$2016/kW) | Cell Voltage (V) | Current Density (mA/cm <sup>2</sup> ) | Installation Factor | Justification and Reference                                                                                                                             |
|------------------------------|--------------------------------------|------------------|---------------------------------------|---------------------|---------------------------------------------------------------------------------------------------------------------------------------------------------|
| <b>PEM Electrolyzer</b>      |                                      |                  |                                       |                     |                                                                                                                                                         |
| Current                      | 460                                  | 1.9              | 2000                                  | 1.12                | From DOE H2A analysis model <sup>9</sup> . Pt group metal is assumed 16% of uninstalled capital with Anode/Cathode loading ratio 7/4 <sup>10</sup> .    |
| Future                       | 233                                  | 1.8              | 3000                                  | 1.1                 | From DOE H2A analysis model <sup>11</sup> . Pt group metal is assumed 13% of uninstalled capital with Anode/Cathode loading ratio 7/4 <sup>10</sup> .   |
| Theoretical                  | 100                                  | 1.8              | 3000                                  | 1.1                 | From DOE H2A technical report <sup>12</sup> . Pt group metal is assumed 13% of uninstalled capital with Anode/Cathode loading ratio 7/4 <sup>10</sup> . |
| <b>SOEC Electrolyzer</b>     |                                      |                  |                                       |                     |                                                                                                                                                         |
| Current                      | 523                                  | 1.285            | 1000                                  | 1.12                | From DOE H2A analysis model <sup>13</sup>                                                                                                               |
| Future                       | 357                                  | 1.285            | 1200                                  | 1.1                 | From DOE H2A analysis model <sup>14</sup>                                                                                                               |
| Theoretical                  | 150                                  | 1.285            | 2000                                  | 1.1                 | From DOE H2A analysis model <sup>12</sup>                                                                                                               |
| <b>Alkaline Electrolyzer</b> |                                      |                  |                                       |                     |                                                                                                                                                         |
| Current                      | 378                                  | 1.75             | 175                                   | 1.2                 | From DOE H2A analysis model <sup>15, 16</sup>                                                                                                           |

|             |     |      |     |     |                                               |
|-------------|-----|------|-----|-----|-----------------------------------------------|
| Future      | 295 | 1.65 | 200 | 1.1 | From DOE H2A analysis model <sup>15, 16</sup> |
| Theoretical | 197 | 1.65 | 200 | 1.1 | From DOE H2A analysis model <sup>15, 16</sup> |

**Table S4:** Cost assumptions for Bio- and Thermo- reactor.

| Parameter                   | Assumption                              | Year of Quote | Installation Factor | Justification and Reference                                                |
|-----------------------------|-----------------------------------------|---------------|---------------------|----------------------------------------------------------------------------|
| <b>Capital Cost (CAPEX)</b> |                                         |               |                     |                                                                            |
| Bioreactor                  | $[X / (5.00E + 5)] ^ 1.0 * (\$782,600)$ | 2013          | 1.6                 | From 2011 NREL design report <sup>17</sup> . (x in unit of Liter per hour) |
| Thermo-reactor              | $[X / (12.5)] ^ 0.6 * (\$872,300)$      | 2011          | 2.6                 | From 2011 NREL design report <sup>18</sup> . (x in unit of mmscf per hour) |

**Table S5:** Cost assumptions for separation processes

| Parameter                                                                 | Assumption                                   | Year of Quote | Installation Factor | Justification and Reference                                                                                                                           |
|---------------------------------------------------------------------------|----------------------------------------------|---------------|---------------------|-------------------------------------------------------------------------------------------------------------------------------------------------------|
| <b>Capital Cost (CAPEX)</b>                                               |                                              |               |                     |                                                                                                                                                       |
| CO <sub>2</sub> Separation Cost (\$/Metric Ton CO <sub>2</sub> separated) | $[271.3(X)] ^{-0.245}$                       | 2016          | 1.0                 | From IHS potassium carbonate CO <sub>2</sub> separation system based on the total recycled CO <sub>2</sub> amount. (x in unit of million lb per year) |
| Pressure Swing Adsorption (PSA)                                           | $[X / (4.40 E + 6)] ^ 0.65 * (\$10,800,000)$ | 2010          | 1.0                 | From Joshua Spurgeon et al. 2018 <sup>19</sup> , Xuping Li et al. 2016 <sup>20</sup> . (x in unit of mol per hour)                                    |
| Liquid/Gas Flash Tank                                                     | $[X / (2.64E + 5)] ^ 0.70 * (\$511,000)$     | 2009          | 2.0                 | From 2011 NREL design report <sup>17</sup> . (x in unit of kg per hour)                                                                               |
| Ethanol Distillation                                                      | $[X / (2.27E + 4)] ^ 0.60 * (\$6,008,000)$   | 2009          | 2.1                 | From 2011 NREL design report <sup>17</sup> . (x in unit of kg per hour)                                                                               |
| Methanol Distillation                                                     | $[X / (2.27E + 4)] ^ 0.60 * (\$3,407,000)$   | 2009          | 2.1                 | From 2011 NREL design report <sup>18</sup> . (x in unit of kg per hour)                                                                               |
| Formic Acid Reactive Distillation                                         | $[X / (1500)] ^ 0.60 * (\$834,000)$          | 2014          | 1.7                 | From ChemCAD Model and Mar Perez-Fortes, 2016 <sup>21</sup> . (x in unit of kg per hour)                                                              |
| Base/Acid Mixer Tank Agitator                                             | $[X / (1.40E+5)] ^ 0.60 * (\$9,000)$         | 2007          | 3.0                 | From 2011 NREL design report <sup>17</sup> . (x in unit of kg per hour)                                                                               |
| Base/Acid Mixer Tank                                                      | $[X / (1.40E+5)] ^ 0.60 * (\$131,000)$       | 2007          | 3.0                 | From 2011 NREL design report <sup>17</sup> . (x in unit of kg per hour)                                                                               |
| Liquid/Solid Separator                                                    | $[X / (3.20E+4)] ^ 0.80 * (\$293,000)$       | 2009          | 3.0                 | From 2011 NREL design report <sup>17</sup> . (x in unit of kg per hour)                                                                               |
| Acetate Membrane Separator                                                | $[X / (3.62E+5)] ^ 0.70 * (\$8,000,000)$     | 2010          | 2.0                 | Estimated in Aspen Capital Cost Estimator. (x in unit of kg per hour)                                                                                 |
| PHB Separator                                                             | $[X / (1.60E+4)] ^ 0.80 * (\$27,500,000)$    | 2011          | 1.0                 | Estimated in Aspen Capital Cost Estimator. (x in unit of kg per hour)                                                                                 |
| <b>Operating Cost (OPEX)</b>                                              |                                              |               |                     |                                                                                                                                                       |
| CO <sub>2</sub> Recycle Stream Compressor Power (kWh)                     | Calculated                                   |               |                     | The CO <sub>2</sub> compressor power is modeled in Aspen Plus under different scenarios based on the total recycled CO <sub>2</sub> amount.           |
| Pressure Swing Adsorption (PSA) Power (kWh)                               | 0.25 kWh/m <sup>3</sup> gas in               |               |                     | From Jouny et al., 2018 <sup>22</sup>                                                                                                                 |
| Distillation Reboiler Duty (Btu)                                          | 6750 Btu/kg product produced                 |               |                     | From 2011 NREL design report <sup>18</sup> .                                                                                                          |
| Amine for Formic Acid Reactive Distillation (kg)                          | 5.8g Amine/g Formic acid produced            |               |                     | From Mar Perez-Fortes, 2016 <sup>5</sup>                                                                                                              |
| Lime for Oxalic Acid precipitation                                        | 0.6 g Lime/g Oxalic acid produced            |               |                     | Based on reaction stoichiometry                                                                                                                       |
| Sulfuric acid for oxalic acid separation                                  | 1.1 g Sulfuric acid/g Oxalic acid produced   |               |                     | Based on reaction stoichiometry                                                                                                                       |

#### 4. Major Economic Assumptions

**Table S6:** Major economic assumptions for discounted cash flow analysis

|                                                     |                                      |
|-----------------------------------------------------|--------------------------------------|
| Economic parameters                                 | Assumed basis                        |
| <b>Basis year for analysis</b>                      | 2016                                 |
| <b>Debt/equity for plant financing</b>              | 60%/40%                              |
| <b>Interest rate and term for debt financing</b>    | 8%/10 years                          |
| <b>Internal rate of return for equity financing</b> | 10%                                  |
| <b>Total income tax rate</b>                        | 21%                                  |
| <b>Plant life</b>                                   | 20 years                             |
| <b>Construction period</b>                          | 3 year                               |
| <b>Fixed capital expenditure schedule</b>           | 32% in year 1                        |
|                                                     | 60% in year 2                        |
|                                                     | 8% in year 3                         |
| <b>Start-up time</b>                                | 0.5 year                             |
| <b>Revenues during start-up</b>                     | 50%                                  |
| <b>Variable costs during start-up</b>               | 75%                                  |
| <b>Fixed costs during start-up</b>                  | 100%                                 |
| <b>Site development cost</b>                        | 9% of ISBL, total installed cost     |
| <b>Warehouse</b>                                    | 1.5% of ISBL                         |
| <b>Working capital</b>                              | 5% of fixed capital investment       |
| <b>Indirect costs</b>                               | % of total direct costs              |
| <b>Prorated expenses</b>                            | 10                                   |
| <b>Home office and construction fees</b>            | 20                                   |
| <b>Field expenses</b>                               | 10                                   |
| <b>Project contingency</b>                          | 10                                   |
| <b>Other costs (start-up and permitting)</b>        | 10                                   |
| <b>Fixed operating cost</b>                         | Assumed Basis                        |
| <b>Plant operators' salaries</b>                    | 5.24 Operators / Shift               |
| <b>Maintenance salaries</b>                         | 1% of fixed capital investment       |
| <b>Supervision &amp; administration</b>             | 40% of operators & maintenance labor |
| <b>Fringe benefits</b>                              | 30% of total labor                   |
| <b>Supplies</b>                                     | 1.75% of fixed capital investment    |
| <b>Insurance and local tax</b>                      | 0.8% of fixed capital investment     |
| ISBL=inside battery limits (of the plant)           |                                      |

**Table S7:** Major Technical Parameters for Future and Theoretical Scenarios

| LTE Pathway                                |                   |                      |                                                                                                                                                                                                               |
|--------------------------------------------|-------------------|----------------------|---------------------------------------------------------------------------------------------------------------------------------------------------------------------------------------------------------------|
|                                            | Future Scenario   | Theoretical Scenario | Justification and Reference                                                                                                                                                                                   |
| Current Density (mA/cm <sup>2</sup> )      | 1500              | 2000                 | Quote from reported current density values for PEM water electrolyzer in DOE H2A model <sup>9</sup> .                                                                                                         |
| Cell Voltage (V)                           | Theoretical +0.6V | Theoretical          | Future scenario applies +0.6V cell overpotential on the theoretical voltage based on the reported overpotential values for PEM water electrolyzer <sup>23</sup> .                                             |
| Faradaic Efficiency (%)                    | 95                | 100                  | Quote from current CO <sub>2</sub> -to-CO faradaic efficiency that is reported ~100% <sup>24</sup> .                                                                                                          |
| Single-pass CO <sub>2</sub> Conversion (%) | 90                | 100                  | Future projection of 90% single-pass CO <sub>2</sub> conversion is made by assuming ongoing technologies such as direct electrolytic conversion of carbon capture solutions <sup>25, 26</sup> can potentially |

|                                                    |                                          |                      |                                                                                                                                                                                                                                                                         |
|----------------------------------------------------|------------------------------------------|----------------------|-------------------------------------------------------------------------------------------------------------------------------------------------------------------------------------------------------------------------------------------------------------------------|
|                                                    |                                          |                      | address the low CO <sub>2</sub> conversion issue.                                                                                                                                                                                                                       |
| <b>HTE Pathway</b>                                 |                                          |                      |                                                                                                                                                                                                                                                                         |
| Current Density (mA/cm <sup>2</sup> )              | 2,500                                    | 3,000                | Quote from reported current density values for SOEC system <sup>27</sup> .                                                                                                                                                                                              |
| Cell Voltage (V)                                   | Avg of SOT and Theoretical Cell Voltages | Theoretical          | This assumption is based on engineering judgement.<br><br>Other major technical parameter assumptions such as faradaic efficiency and single-pass CO <sub>2</sub> conversion are consistent with LTE pathway.                                                           |
| <b>MES Pathway</b>                                 |                                          |                      |                                                                                                                                                                                                                                                                         |
| Current Density (mA/cm <sup>2</sup> )              | 100                                      | 200                  | Quote from reported current density values for alkaline water electrolyzer <sup>15, 16</sup> .<br><br>Other major technical parameter assumptions such as cell voltage, faradaic efficiency and single-pass CO <sub>2</sub> conversion are consistent with LTE pathway. |
| <b>BC Pathway</b>                                  |                                          |                      |                                                                                                                                                                                                                                                                         |
| Feedstock (H <sub>2</sub> /CO <sub>2</sub> ) Ratio | Stoichiometry                            | Stoichiometry        | Stoichiometry has the optimistic H <sub>2</sub> : CO <sub>2</sub> ratio and excess H <sub>2</sub> feedstock is needed in some SOT cases to enhance the production rate of final product.                                                                                |
| Product Titer (g/L)                                | Highest reported value in Batch          | Bacteria death limit | These assumptions are based on subject matter expert interviews and engineering judgement.                                                                                                                                                                              |
| Productivity (g/L/hr)                              | Highest reported value in Batch          | 10                   | Theoretical productivity projection is made based on the reported commercialized ethanol productivity~10g/L/hr <sup>28</sup> .                                                                                                                                          |
| Single-pass CO <sub>2</sub> Conversion (%)         | 90                                       | 98                   | Future project of 90% single-pass CO <sub>2</sub> conversion is made to be consistent with LTE pathway. 2% CO <sub>2</sub> loss to cell growth is assumed in theoretical scenario <sup>29</sup> .                                                                       |
| <b>TC Pathway</b>                                  |                                          |                      |                                                                                                                                                                                                                                                                         |
| Feedstock (H <sub>2</sub> /CO <sub>2</sub> ) Ratio | Stoichiometry                            | Stoichiometry        | Consistent assumptions with BC pathway.                                                                                                                                                                                                                                 |
| Single-pass CO <sub>2</sub> Conversion (%)         | 90                                       | Theoretical          | Theoretical is calculated using ASPENPlus Gibbs Reactor. Future project of 90% single-pass CO <sub>2</sub> conversion is made to be consistent with LTE pathway. Future single-pass CO <sub>2</sub> conversion equals theoretical value if <90%                         |
| Product Selectivity (%)                            | 95                                       | 100                  | Future project of 95% product selectivity is made to be consistent with LTE pathway faradaic efficiency.                                                                                                                                                                |

## 5. Cost Breakdown Analysis

**Table S8:** Cost breakdown of selected products for LTE pathway

| Scenarios                     | Current | Future | Theoretical |
|-------------------------------|---------|--------|-------------|
| CO                            |         |        |             |
| PEM Electrolyzer Capital      | 37%     | 20%    | 26%         |
| Separation Capital            | 1%      | 2%     | 0%          |
| CO <sub>2</sub> Cost          | 4%      | 13%    | 0%          |
| Electrolysis Cost             | 37%     | 56%    | 73%         |
| Utility &Supplies             | 1%      | 3%     | 0%          |
| CO <sub>2</sub> Separation    | 20%     | 6%     | 0%          |
| Minimum Selling Price (\$/kg) | 1.55    | 0.23   | 0.07        |
| Formic Acid                   |         |        |             |
| PEM Electrolyzer Capital      | 40%     | 28%    | 25%         |
| Separation Capital            | 1%      | 5%     | 0%          |
| CO <sub>2</sub> Cost          | 3%      | 10%    | 0%          |
| Electrolysis Cost             | 34%     | 45%    | 75%         |
| Utility &Supplies             | 4%      | 7%     | 0%          |
| CO <sub>2</sub> Separation    | 16%     | 5%     | 0%          |
| Minimum Selling Price (\$/kg) | 1.36    | 0.23   | 0.05        |
| Oxalic Acid                   |         |        |             |
| PEM Electrolyzer Capital      | 42%     | 15%    | 23%         |
| Separation Capital            | 1%      | 2%     | 0%          |
| CO <sub>2</sub> Cost          | 2%      | 5%     | 0%          |
| Electrolysis Cost             | 34%     | 13%    | 77%         |
| Utility &Supplies             | 11%     | 62%    | 0%          |
| CO <sub>2</sub> Separation    | 10%     | 2%     | 0%          |
| Minimum Selling Price (\$/kg) | 2.23    | 0.33   | 0.03        |
| Ethylene                      |         |        |             |
| PEM Electrolyzer Capital      | 13%     | 29%    | 28%         |
| Separation Capital            | 1%      | 1%     | 0%          |
| CO <sub>2</sub> Cost          | 3%      | 5%     | 0%          |
| Electrolysis Cost             | 66%     | 61%    | 71%         |
| Utility &Supplies             | 1%      | 1%     | 1%          |
| CO <sub>2</sub> Separation    | 16%     | 2%     | 0%          |
| Minimum Selling Price (\$/kg) | 6.39    | 1.20   | 0.42        |
| Ethanol                       |         |        |             |
| PEM Electrolyzer Capital      | 47%     | 29%    | 25%         |
| Separation Capital            | 1%      | 2%     | 6%          |
| CO <sub>2</sub> Cost          | 2%      | 5%     | 0%          |
| Electrolysis Cost             | 41%     | 57%    | 59%         |
| Utility &Supplies             | 1%      | 4%     | 10%         |
| CO <sub>2</sub> Separation    | 9%      | 2%     | 0%          |
| Minimum Selling Price (\$/kg) | 6.07    | 0.74   | 0.30        |
| Methanol                      |         |        |             |
| PEM Electrolyzer Capital      | 74%     | 34%    | 26%         |
| Separation Capital            | 0%      | 2%     | 4%          |
| CO <sub>2</sub> Cost          | 0%      | 5%     | 0%          |
| Electrolysis Cost             | 23%     | 53%    | 60%         |
| Utility &Supplies             | 1%      | 4%     | 10%         |
| CO <sub>2</sub> Separation    | 2%      | 2%     | 0%          |
| Minimum Selling Price (\$/kg) | 14.82   | 0.54   | 0.22        |
| Methane                       |         |        |             |
| PEM Electrolyzer Capital      | 53%     | 31%    | 33%         |
| Separation Capital            | 1%      | 2%     | 0%          |
| CO <sub>2</sub> Cost          | 1%      | 3%     | 0%          |

|                                      |       |      |      |
|--------------------------------------|-------|------|------|
| <b>Electrolysis Cost</b>             | 37%   | 46%  | 67%  |
| <b>Utility &amp;Supplies</b>         | 2%    | 16%  | 0%   |
| <b>CO<sub>2</sub> Separation</b>     | 5%    | 1%   | 0%   |
| <b>Minimum Selling Price (\$/kg)</b> | 16.97 | 1.74 | 0.47 |

**Table S9:** Cost breakdown of selected products for HTE pathway

| Scenarios                            | Current | Future | Theoretical |
|--------------------------------------|---------|--------|-------------|
| CO                                   |         |        |             |
| <b>SOEC Electrolyzer Capital</b>     | 24%     | 14%    | 19%         |
| <b>Separation Capital</b>            | 3%      | 2%     | 2%          |
| <b>CO<sub>2</sub> Cost</b>           | 16%     | 22%    | 0%          |
| <b>Electrolysis Cost</b>             | 48%     | 52%    | 70%         |
| <b>Utility &amp;Supplies</b>         | 2%      | 6%     | 8%          |
| <b>CO<sub>2</sub> Separation</b>     | 6%      | 5%     | 0%          |
| <b>Minimum Selling Price (\$/kg)</b> | 0.38    | 0.15   | 0.05        |
| CH <sub>4</sub>                      |         |        |             |
| <b>SOEC Electrolyzer Capital</b>     | 15%     | 19%    | 17%         |
| <b>Separation Capital</b>            | 2%      | 2%     | 2%          |
| <b>CO<sub>2</sub> Cost</b>           | 1%      | 7%     | 0%          |
| <b>Electrolysis Cost</b>             | 66%     | 64%    | 77%         |
| <b>Utility &amp;Supplies</b>         | 5%      | 4%     | 3%          |
| <b>CO<sub>2</sub> Separation</b>     | 11%     | 3%     | 0%          |
| <b>Minimum Selling Price (\$/kg)</b> | 11.15   | 0.77   | 0.36        |

**Table S10:** Cost breakdown of selected products for MES pathway

| Scenarios                            | Current | Future | Theoretical |
|--------------------------------------|---------|--------|-------------|
| CH <sub>4</sub>                      |         |        |             |
| <b>MES Reactor Capital</b>           | 74%     | 44%    | 41%         |
| <b>Separation Capital</b>            | 0%      | 0%     | 0%          |
| <b>CO<sub>2</sub> Cost</b>           | 0%      | 4%     | 0%          |
| <b>Electrolysis Cost</b>             | 25%     | 47%    | 51%         |
| <b>Utility &amp;Supplies</b>         | 0%      | 3%     | 7%          |
| <b>CO<sub>2</sub> Separation</b>     | 1%      | 2%     | 0%          |
| <b>Minimum Selling Price (\$/kg)</b> | 107.76  | 1.90   | 0.76        |
| Formic Acid                          |         |        |             |
| <b>MES Reactor Capital</b>           | 71%     | 54%    | 45%         |
| <b>Separation Capital</b>            | 1%      | 5%     | 10%         |
| <b>CO<sub>2</sub> Cost</b>           | 1%      | 5%     | 0%          |
| <b>Electrolysis Cost</b>             | 23%     | 22%    | 30%         |
| <b>Utility &amp;Supplies</b>         | 1%      | 11%    | 15%         |
| <b>CO<sub>2</sub> Separation</b>     | 3%      | 2%     | 1%          |
| <b>Minimum Selling Price (\$/kg)</b> | 26.42   | 0.29   | 0.21        |
| Acetic Acid                          |         |        |             |
| <b>MES Reactor Capital</b>           | 66%     | 50%    | 52%         |
| <b>Separation Capital</b>            | 2%      | 7%     | 6%          |
| <b>CO<sub>2</sub> Cost</b>           | 1%      | 5%     | 0%          |
| <b>Electrolysis Cost</b>             | 23%     | 32%    | 35%         |
| <b>Utility &amp;Supplies</b>         | 1%      | 3%     | 6%          |
| <b>CO<sub>2</sub> Separation</b>     | 7%      | 2%     | 0%          |
| <b>Minimum Selling Price (\$/kg)</b> | 5.32    | 0.57   | 0.22        |
| Ethanol                              |         |        |             |
| <b>MES Reactor Capital</b>           | 76%     | 55%    | 58%         |
| <b>Separation Capital</b>            | 0%      | 2%     | 3%          |



|                                      |        |      |      |
|--------------------------------------|--------|------|------|
| <b>CO<sub>2</sub> Cost</b>           | 0%     | 3%   | 0%   |
| <b>Electrolysis Cost</b>             | 22%    | 34%  | 29%  |
| <b>Utility &amp;Supplies</b>         | 0%     | 5%   | 9%   |
| <b>CO<sub>2</sub> Separation</b>     | 1%     | 2%   | 0%   |
| <b>Minimum Selling Price (\$/kg)</b> | 441.01 | 1.10 | 0.54 |

**Table S11: Cost breakdown of selected products for BC pathway**

| Scenarios                            | Current | Future | Theoretical |
|--------------------------------------|---------|--------|-------------|
| <b>CH<sub>4</sub></b>                |         |        |             |
| <b>Bioreactor Capital</b>            | 5%      | 5%     | 3%          |
| <b>Separation Capital</b>            | 0%      | 0%     | 0%          |
| <b>CO<sub>2</sub> Cost</b>           | 5%      | 5%     | 0%          |
| <b>H<sub>2</sub> Cost</b>            | 89%     | 88%    | 96%         |
| <b>Nutrient Cost</b>                 | 0%      | 1%     | 1%          |
| <b>Utility &amp;Supplies</b>         | 0%      | 1%     | 1%          |
| <b>Minimum Selling Price (\$/kg)</b> | 2.22    | 1.04   | 0.64        |
| <b>Acetic Acid</b>                   |         |        |             |
| <b>Bioreactor Capital</b>            | 11%     | 5%     | 5%          |
| <b>Separation Capital</b>            | 6%      | 7%     | 7%          |
| <b>CO<sub>2</sub> Cost</b>           | 6%      | 9%     | 0%          |
| <b>H<sub>2</sub> Cost</b>            | 55%     | 70%    | 78%         |
| <b>Nutrient Cost</b>                 | 13%     | 7%     | 7%          |
| <b>Utility &amp;Supplies</b>         | 9%      | 3%     | 3%          |
| <b>Minimum Selling Price (\$/kg)</b> | 0.95    | 0.34   | 0.21        |
| <b>Ethanol</b>                       |         |        |             |
| <b>Bioreactor Capital</b>            | 3%      | 3%     | 8%          |
| <b>Separation Capital</b>            | 3%      | 3%     | 9%          |
| <b>CO<sub>2</sub> Cost</b>           | 5%      | 9%     | 0%          |
| <b>H<sub>2</sub> Cost</b>            | 79%     | 64%    | 75%         |
| <b>CO and Nutrient Cost</b>          | 7%      | 13%    | 0%          |
| <b>Utility &amp;Supplies</b>         | 3%      | 8%     | 9%          |
| <b>Minimum Selling Price (\$/kg)</b> | 1.27    | 0.64   | 0.39        |
| <b>PHB</b>                           |         |        |             |
| <b>Bioreactor Capital</b>            | 12%     | 10%    | 15%         |
| <b>Separation Capital</b>            | 9%      | 12%    | 17%         |
| <b>CO<sub>2</sub> Cost</b>           | 5%      | 6%     | 0%          |
| <b>H<sub>2</sub> Cost</b>            | 61%     | 59%    | 50%         |
| <b>Nutrient Cost</b>                 | 3%      | 3%     | 4%          |
| <b>Utility &amp;Supplies</b>         | 9%      | 10%    | 14%         |
| <b>CO<sub>2</sub> Separation</b>     | 1%      | 2%     | 0%          |
| <b>Minimum Selling Price (\$/kg)</b> | 1.36    | 0.64   | 0.37        |

**Table S12: Cost breakdown of selected products for TC pathway**

| Scenarios                            | Current | Future | Theoretical |
|--------------------------------------|---------|--------|-------------|
| <b>CO</b>                            |         |        |             |
| <b>Thermo Capital</b>                | 1%      | 1%     | 1%          |
| <b>Product Separation</b>            | 3%      | 5%     | 2%          |
| <b>CO<sub>2</sub> Cost</b>           | 14%     | 13%    | 0%          |
| <b>H<sub>2</sub> Cost</b>            | 63%     | 52%    | 53%         |
| <b>CO<sub>2</sub> Separation</b>     | 10%     | 18%    | 28%         |
| <b>Utilities</b>                     | 9%      | 11%    | 15%         |
| <b>Minimum Selling Price (\$/kg)</b> | 0.45    | 0.25   | 0.16        |
| <b>CH<sub>4</sub></b>                |         |        |             |

|                                      |      |      |      |
|--------------------------------------|------|------|------|
| <b>Thermo Capital</b>                | 1%   | 1%   | 1%   |
| <b>Product Separation</b>            | 2%   | 3%   | 2%   |
| <b>CO<sub>2</sub> Cost</b>           | 5%   | 5%   | 0%   |
| <b>H<sub>2</sub> Cost</b>            | 86%  | 84%  | 88%  |
| <b>CO<sub>2</sub> Separation</b>     | 1%   | 1%   | 5%   |
| <b>Utilities</b>                     | 4%   | 4%   | 4%   |
| <b>Minimum Selling Price (\$/kg)</b> | 2.28 | 1.08 | 0.68 |
| Methanol                             |      |      |      |
| <b>Thermo Capital</b>                | 1%   | 1%   | 1%   |
| <b>Product Separation</b>            | 6%   | 9%   | 6%   |
| <b>CO<sub>2</sub> Cost</b>           | 5%   | 4%   | 0%   |
| <b>H<sub>2</sub> Cost</b>            | 48%  | 43%  | 44%  |
| <b>CO<sub>2</sub> Separation</b>     | 16%  | 25%  | 36%  |
| <b>Utilities</b>                     | 24%  | 19%  | 13%  |
| <b>Minimum Selling Price (\$/kg)</b> | 1.66 | 0.80 | 0.52 |
| DME                                  |      |      |      |
| <b>Thermo Capital</b>                | 1%   | 1%   | 1%   |
| <b>Product Separation</b>            | 6%   | 8%   | 4%   |
| <b>CO<sub>2</sub> Cost</b>           | 5%   | 4%   | 0%   |
| <b>H<sub>2</sub> Cost</b>            | 58%  | 55%  | 53%  |
| <b>CO<sub>2</sub> Separation</b>     | 15%  | 22%  | 29%  |
| <b>Utilities</b>                     | 15%  | 10%  | 13%  |
| <b>Minimum Selling Price (\$/kg)</b> | 1.89 | 0.87 | 0.58 |
| FT-hydrocarbon (HC)                  |      |      |      |
| <b>Thermo Capital</b>                | 17%  | 21%  | 28%  |
| <b>Product Separation</b>            | 2%   | 3%   | 2%   |
| <b>CO<sub>2</sub> Cost</b>           | 4%   | 5%   | 0%   |
| <b>H<sub>2</sub> Cost</b>            | 55%  | 66%  | 67%  |
| <b>CO<sub>2</sub> Separation</b>     | 11%  | 2%   | 0%   |
| <b>Utilities</b>                     | 11%  | 4%   | 2%   |
| <b>Minimum Selling Price (\$/kg)</b> | 4.52 | 1.31 | 0.81 |

## 6. Sensitivity Analysis

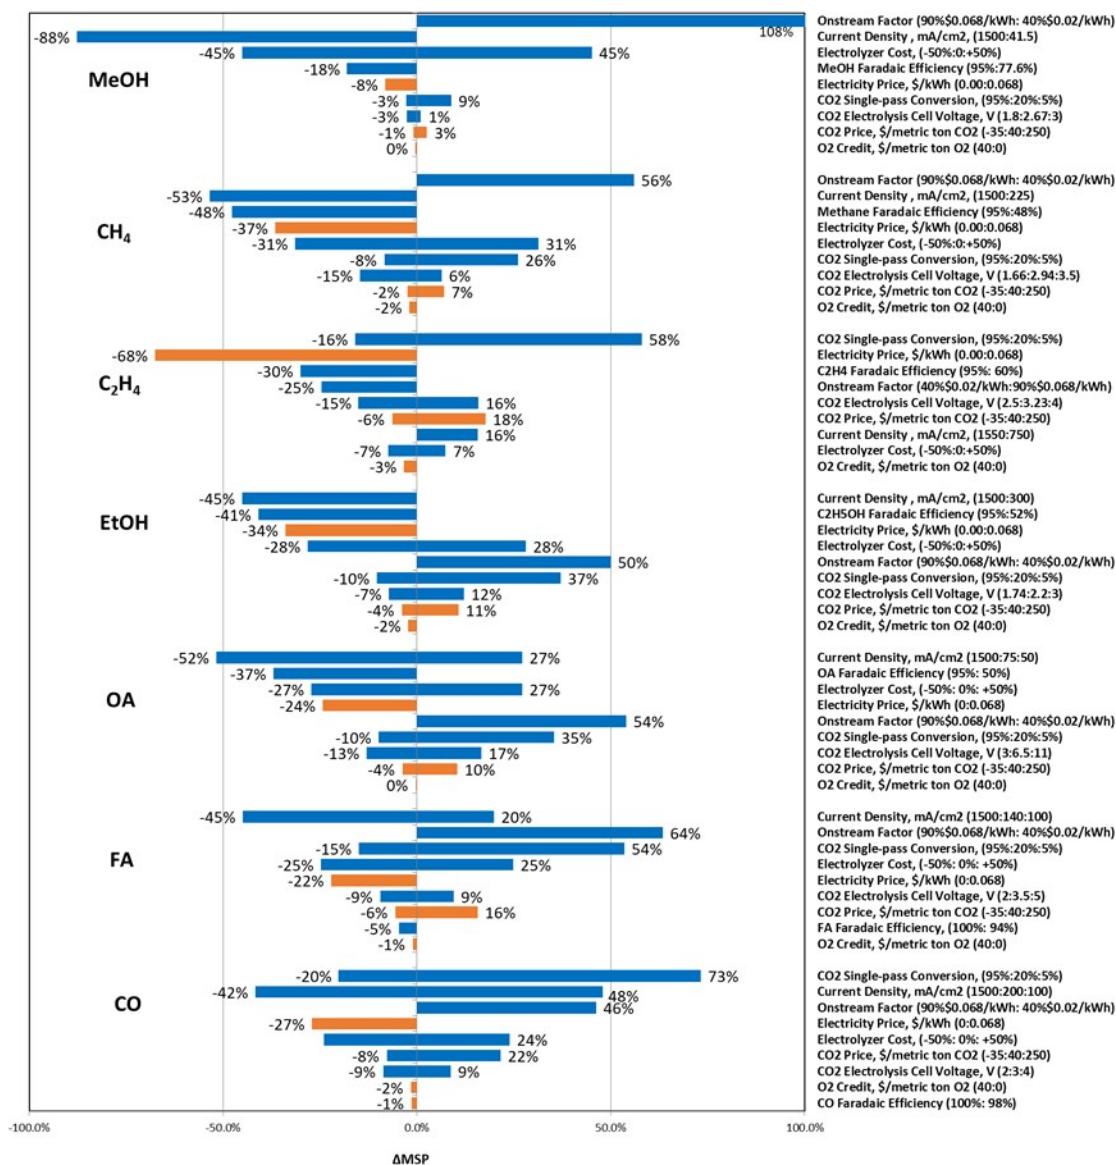

**Figure S2.** Sensitivity analysis of selected products in LTE pathway. Key cost drivers include current density, onstream factor and electrolyzer cost. Blue and orange bars reflect technical and market parameters respectively.

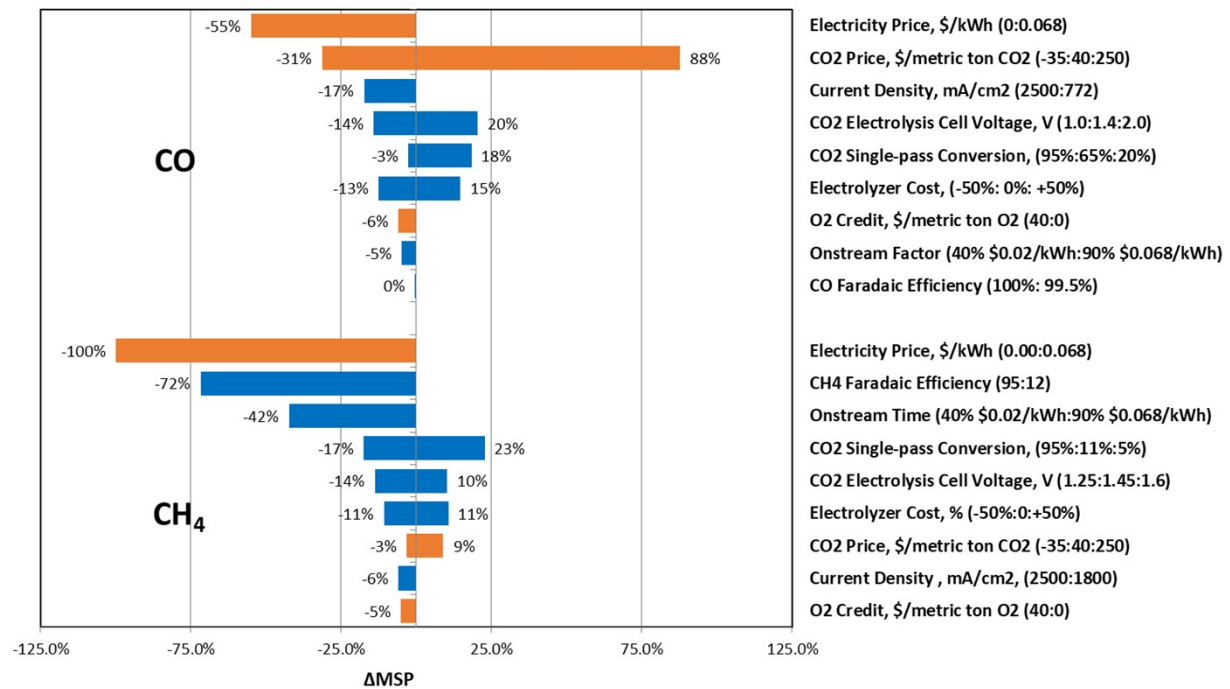

**Figure S3.** Sensitivity analysis of selected products in HTE pathway. Key cost drivers include electricity, CO<sub>2</sub> single-pass conversion and CO<sub>2</sub> cost. Blue and orange bars reflect technical and market parameters respectively.

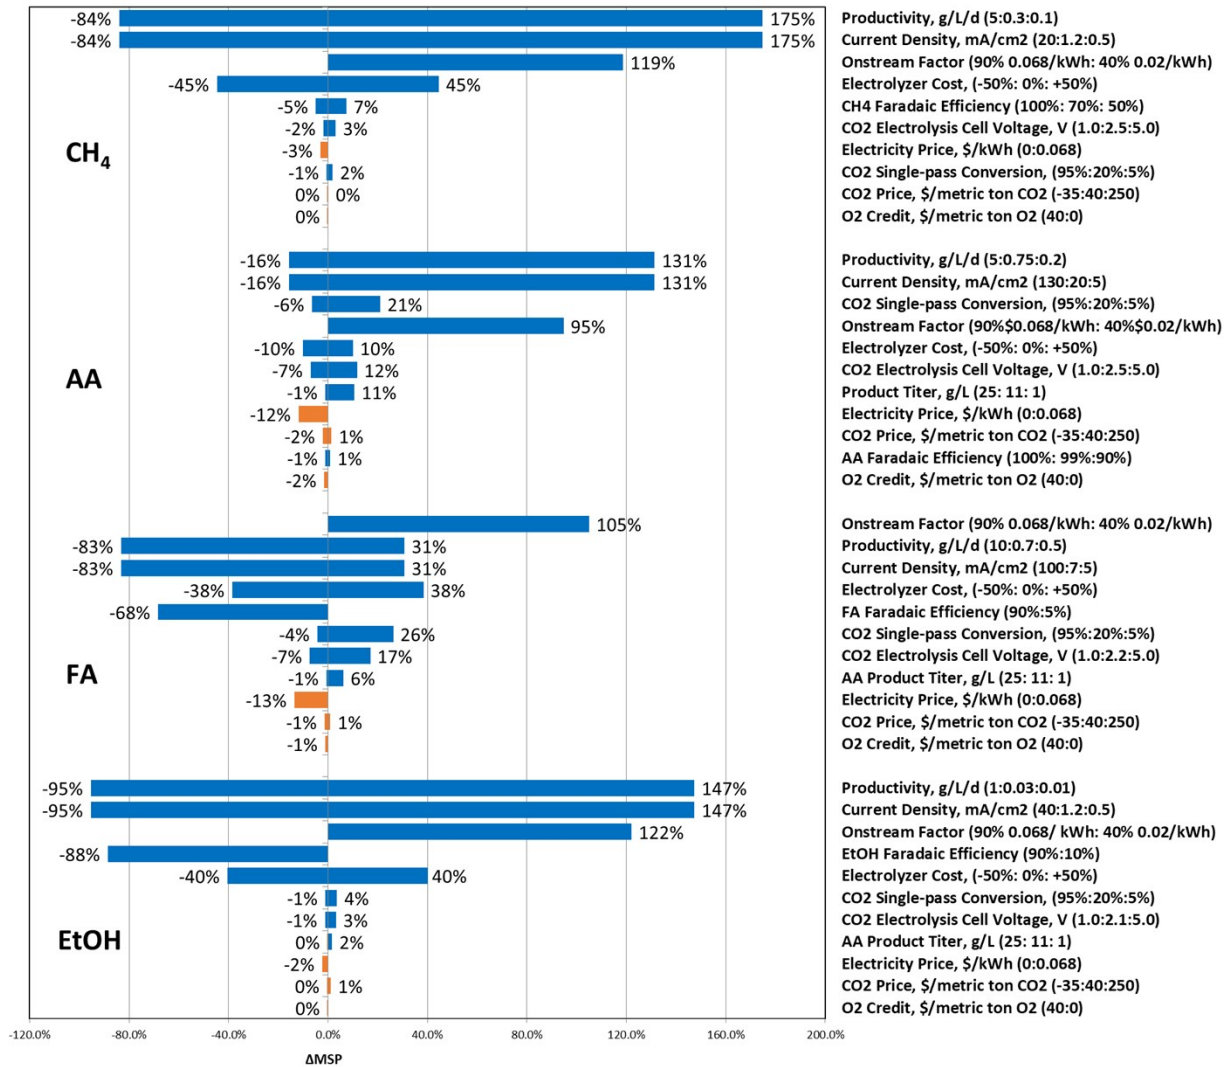

**Figure S4.** Sensitivity analysis of selected products in MES pathway. Key cost drivers include productivity, current density and onstream factor. Blue and orange bars reflect technical and market parameters respectively.

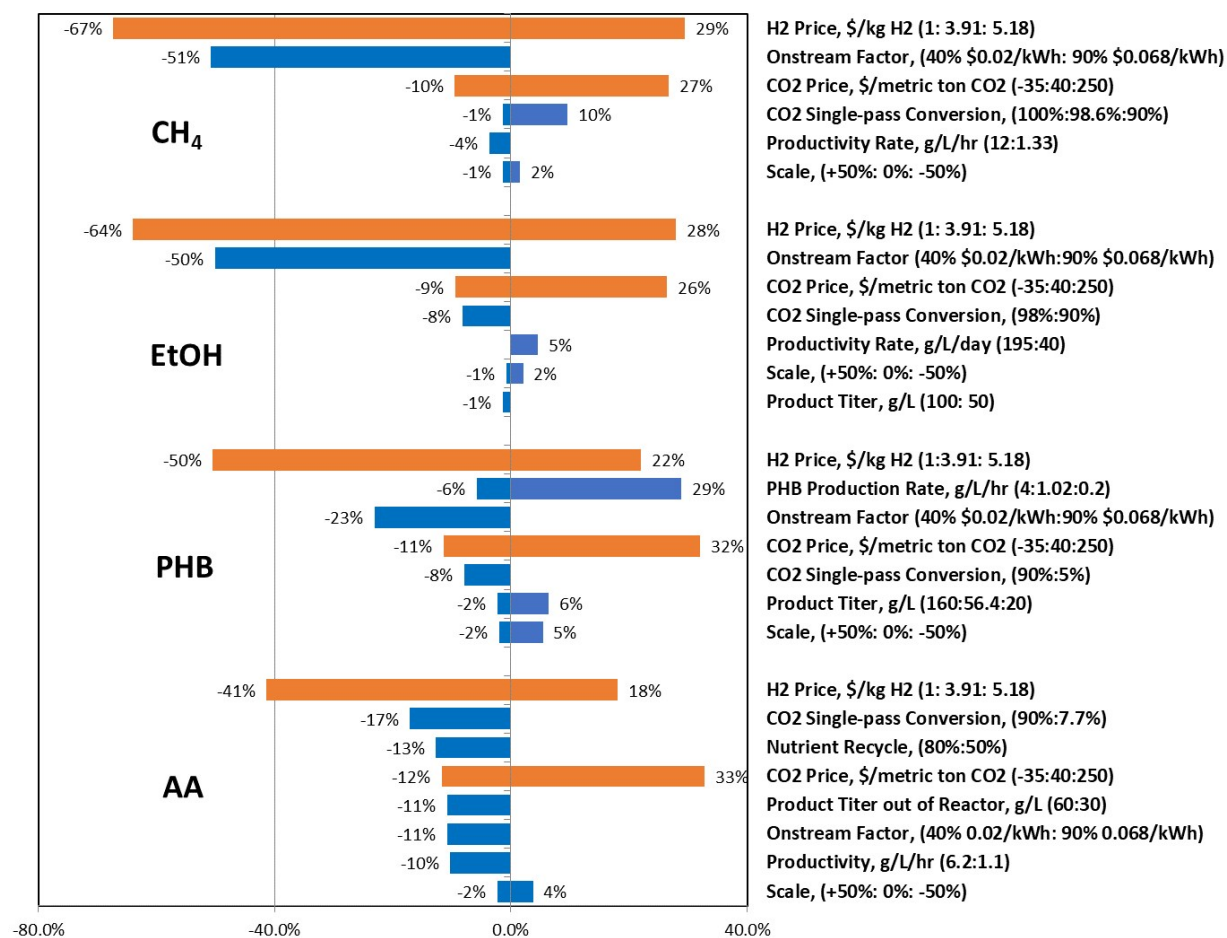

**Figure S5.** Sensitivity analysis of selected products in BC pathway. Key cost drivers include electrolytic H<sub>2</sub> cost, production rate and onstream factor. Blue and orange bars reflect technical and market parameters respectively.

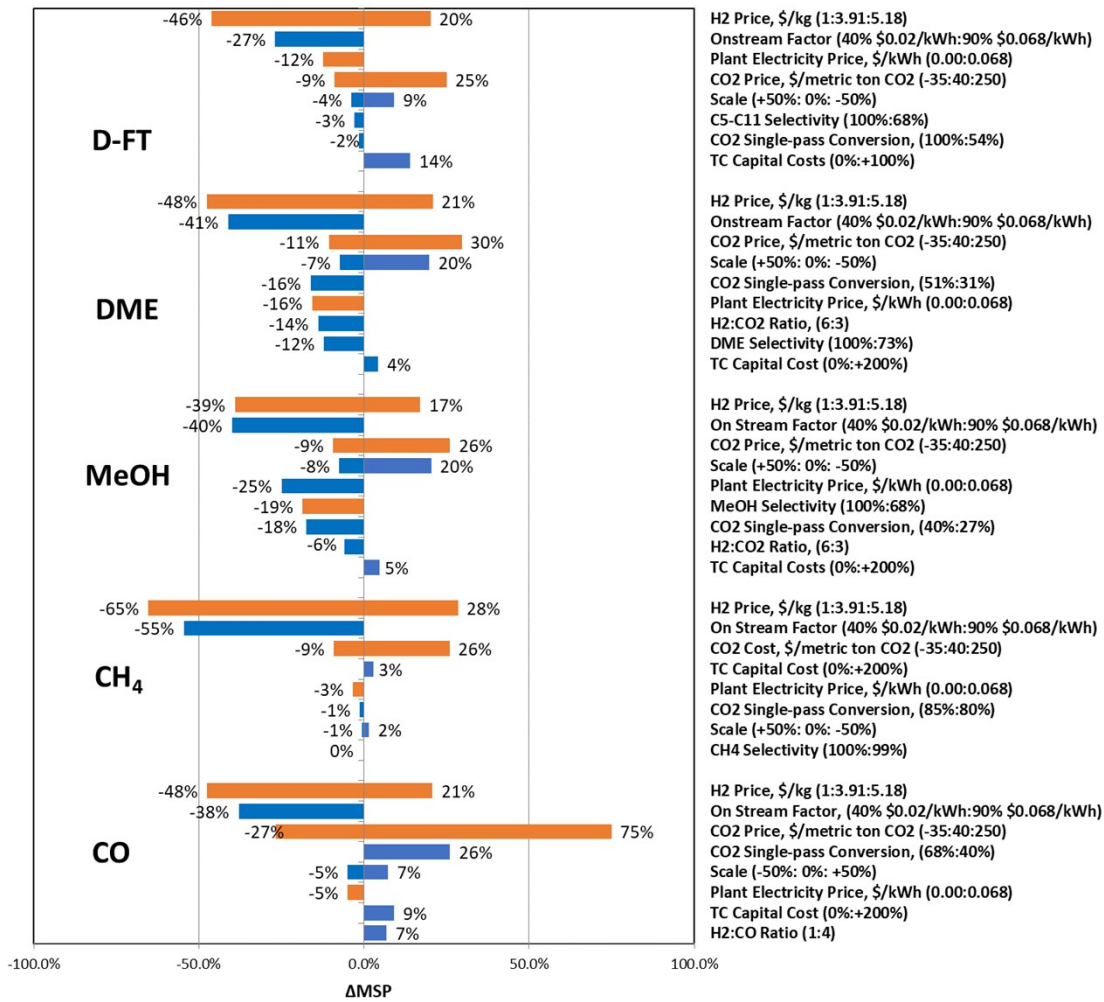

**Figure S6.** Sensitivity analysis of selected products in TC pathway. Key cost drivers include electrolytic H<sub>2</sub> cost, onstream factor and CO<sub>2</sub> cost. Blue and orange bars reflect technical and market parameters respectively.

## 7. CO<sub>2</sub> Price Sensitivity under Current Scenario

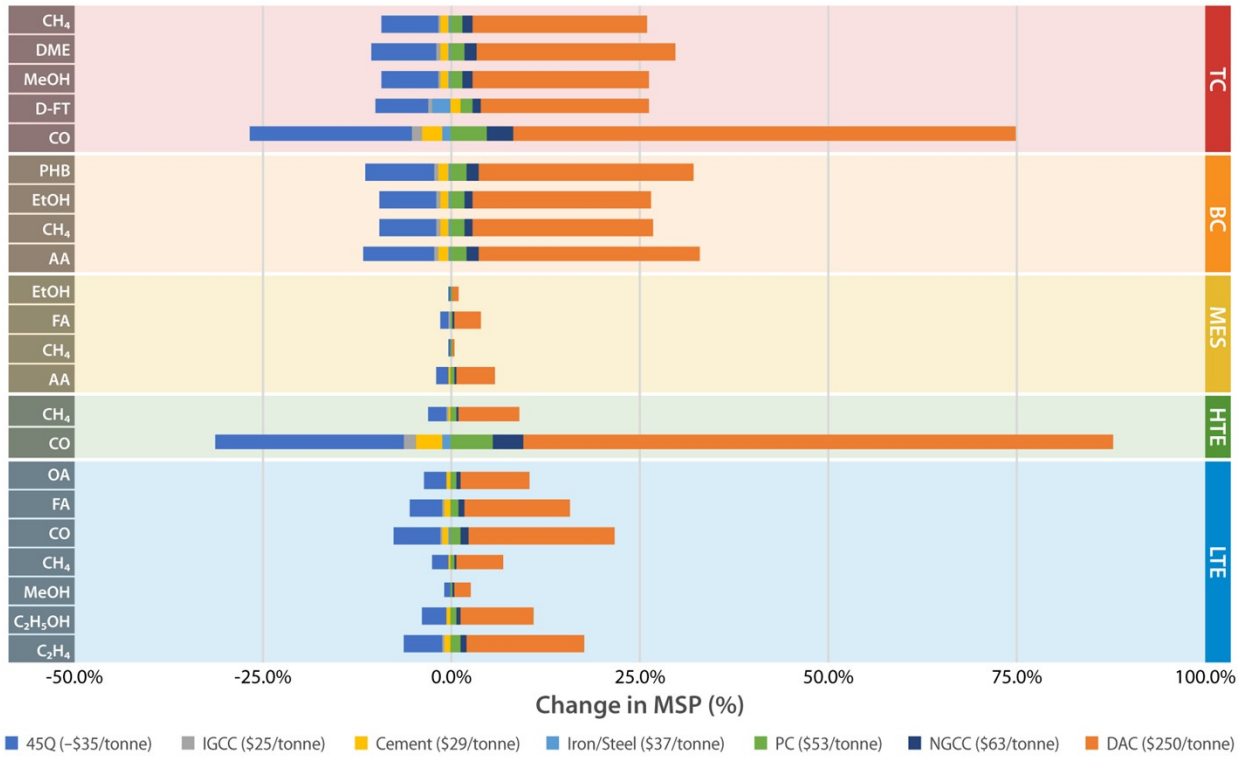

**Figure S7.** The percent change in product minimum selling price (MSP) as a function of CO<sub>2</sub> capture cost assuming current scenario conditions and an initial capture cost of \$40/tonne. Assumed capture costs of -\$35/tonne (45Q), \$25/tonne (IGCC), \$29/tonne (cement), \$37/tonne (iron/steel), \$53/tonne (PC), \$63/tonne (NGCC), and \$250/tonne (DAC) are based on published literature reports<sup>22-24</sup>.



## 8. Reference

1. IHS Market Connet, 2019.
2. R.M. Swanson, A. Platon, J.A. Satrio, R.C. Brown, D.D. Hsu, Techno-Economic Analysis of Biofuels Production Based on Gasification, National Renewable Energy Laboratory (NREL), Golden, CO., 2010, <https://www.nrel.gov/docs/fy11osti/46587.pdf>, (accessed 11/11/2019).
3. E.C. Tan, M. Talmadge, A. Dutta, J. Hensley, J. Schaidle, M. Bidy, D. Humbird, L.J. Snowden-Swan, J. Ross, D. Sexton, R. Yap, National Renewable Energy Laboratory (NREL), Golden, CO., 2015, [www.nrel.gov/docs/fy15osti/62402.pdf](http://www.nrel.gov/docs/fy15osti/62402.pdf), (accessed 11/11/2019).
4. Alibaba, Methanation Catalyst Prices, <https://www.alibaba.com/showroom/methanation-catalyst-price.html>, (accessed 11/12/2019).
5. M. Pérez-Fortes, J. C. Schöneberger, A. Boulamanti, G. Harrison and E. Tzimas, *Int. J. of Hydr. Ener.* 2016, **41**, 16444-16462.
6. U.S. Energy Information Administration: Electricity Data, <https://www.eia.gov/electricity/data.php>, (accessed 11/12/2019).
7. R. G. Grim, Z. Huang, M. T. Guarnieri, J. R. Ferrell, L. Tao and J. A. Schaidle, *Ener. & Environ. Sci.*, 2020, **13**, 472-494.
8. U.S. Environmental Protection Agency: An Overview of Renewable Natural Gas from Biogas, 2020.  
[https://www.epa.gov/sites/production/files/202007/documents/lmop\\_rng\\_document.pdf](https://www.epa.gov/sites/production/files/202007/documents/lmop_rng_document.pdf), (accessed 03/10/2021).
9. NREL, Current Central Hydrogen Production from Polymer Electrolyte Membrane Electrolysis (2019) version 3.2018, <https://www.nrel.gov/hydrogen/h2a-production-models.html>, (accessed 03/10/2021).
10. A. T. Mayyas, M. F. Ruth, B. S. Pivovar, G. Bender and K. B. Wipke, National Renewable Energy Lab, Golden, CO (United States), 2019, <https://www.nrel.gov/docs/fy19osti/72740.pdf>, (accessed 03/10/2021).
11. NREL, Future Central Hydrogen Production from PEM Electrolysis (2019) version 3.2018, <https://www.nrel.gov/hydrogen/h2a-production-models.html>, (accessed 03/10/2021).
12. M. F. Ruth, P. Jadun, N. Gilroy, E. Connelly, R. Boardman, A. Simon, A. Elgowainy and J. Zuboy, National Renewable Energy Lab (NREL), Golden, CO (United States), 2020, <https://www.osti.gov/biblio/1677471>, (accessed 03/10/2021).
13. NREL, Current Central Hydrogen Production from Solid Oxide Electrolysis version 3.2018, <https://www.nrel.gov/hydrogen/h2a-production-case-studies.html>, (accessed 03/10/2021).
14. NREL, Future Central Hydrogen Production from Solid Oxide Electrolysis version 3.2018, <https://www.nrel.gov/hydrogen/h2a-production-case-studies.html>, (accessed 03/10/2021).
15. D. Steward, T. Ramsden and J. Zuboy, H2A Central Production Model Version 3 User Guide (Draft), April 2012, [https://apps1.hydrogen.energy.gov/cfm/h2a\\_active\\_folder/h2a\\_production/03P\\_H2A\\_Central\\_Hydrogen\\_Production\\_Model\\_User\\_Guide\\_Version\\_3\\_draft.pdf](https://apps1.hydrogen.energy.gov/cfm/h2a_active_folder/h2a_production/03P_H2A_Central_Hydrogen_Production_Model_User_Guide_Version_3_draft.pdf), (accessed, 03/10/2021).
16. B. James, J. Moton and W. J. E. Colella, Strategic Analysis, 2013, Guidance for Filling Out a Detailed H2A Production Case Study, [https://www.energy.gov/sites/prod/files/2014/03/f12/webinar\\_slides\\_h2a\\_production\\_analysis\\_070913.pdf](https://www.energy.gov/sites/prod/files/2014/03/f12/webinar_slides_h2a_production_analysis_070913.pdf), (accessed, 03/10/2021).
17. D. Humbird, R. Davis, L. Tao, C. Kinchin, D. Hsu, A. Aden, P. Schoen, J. Lukas, B. Olthof and M. Worley, National Renewable Energy Laboratory (NREL), Golden, CO., 2011, <https://www.nrel.gov/docs/fy11osti/47764.pdf>, (accessed, 03/10/2021).

18. A. Dutta, M. Talmadge, J. Hensley, M. Worley, D. Dudgeon, D. Barton, P. Groendijk, D. Ferrari, B. Stears and E. M. Searcy, National Renewable Energy Laboratory (NREL), Golden, CO., 2011, <https://www.nrel.gov/docs/fy11osti/51400.pdf>, (accessed, 03/10/2021).
19. J. M. Spurgeon and B. Kumar, *Ener. & Environ. Sci.*, 2018, **11**, 1536-1551.
20. X. Li, P. Anderson, H.-R. M. Jhong, M. Paster, J. F. Stubbins and P. J. Kenis, *Energy & Fuels*, 2016, **30**, 5980-5989.
21. A. J. Martin, G. O. Larrazábal and J. Pérez-Ramírez, *Green Chem.*, 2015, **17**, 5114-5130.
22. M. Jouny, W. W. Luc and F. Jiao, *Ind. & Eng. Chem. Res.*, 2018, **57**, 6, 2165–2177.
23. M. Carmo, D. L. Fritz, J. Mergel and D. Stolten, *Int. J. of Hydr. Ener.*, 2013, **38**, 4901-4934.
24. R. I. Masel, Z. Liu, H. Yang, J. J. Kaczur, D. Carrillo, S. Ren, D. Salvatore and C. P. Berlinguette, *Nature Nanotech.*, 2021, 1-11.
25. T. Li, E. W. Lees, M. Goldman, D. A. Salvatore, D. M. Weekes and C. P. Berlinguette, *Joule*, 2019, **3**, 1487-1497.
26. A. J. Welch, E. Dunn, J. S. DuChene and H. A. Atwater, *ACS Energy Lett.* 2020, **5**, 3, 940–945.
27. H. Shimada, T. Yamaguchi, H. Kishimoto, H. Sumi, Y. Yamaguchi, K. Nomura and Y. Fujishiro, *Nature Comm.*, 2019, **10**, 1-10.
28. F. Liew, M. E. Martin, R. C. Tappel, B. D. Heijstra, C. Mihalcea and M. Köpke, *Front. in Microbio.*, 2016, **7**, 694.
29. M. R. Martin, J. J. Fornero, R. Stark, L. Mets and L. T. Angenent, *Archaea*, 2013, **2013**.
